# Supplementary material
Source: PubMed Central journal article supplement (PMC2983100)
Supplement: NIHMS165384-supplement-supp_figs.pdf [file NIHMS165384-supplement-supp_figs.pdf]

## SUPPLEMENTARY INFORMATION

**Fig. S1:** Phenotypes of the  $\Delta abh$  and  $\Delta abrB$  mutants on MSgg solid agar. The Abh regulator proved an ideal way to study the effect of cannibalism on biofilm formation, contrary to its homolog AbrB, which directly regulates the expression of both *eps* and *yqxM* operons by binding directly their promoter regions. Abh is not known to not bind the regulatory regions of *eps* and *yqxM* operons. Although the  $\Delta abrB$  mutant overproduced the cannibalism toxins, its effect could not be seen due to the constitutive derepression of the *eps* and *yqxM* operons.

**Table S1:** List of strains used in this work.

**Table S2:** List of primers used in this work.

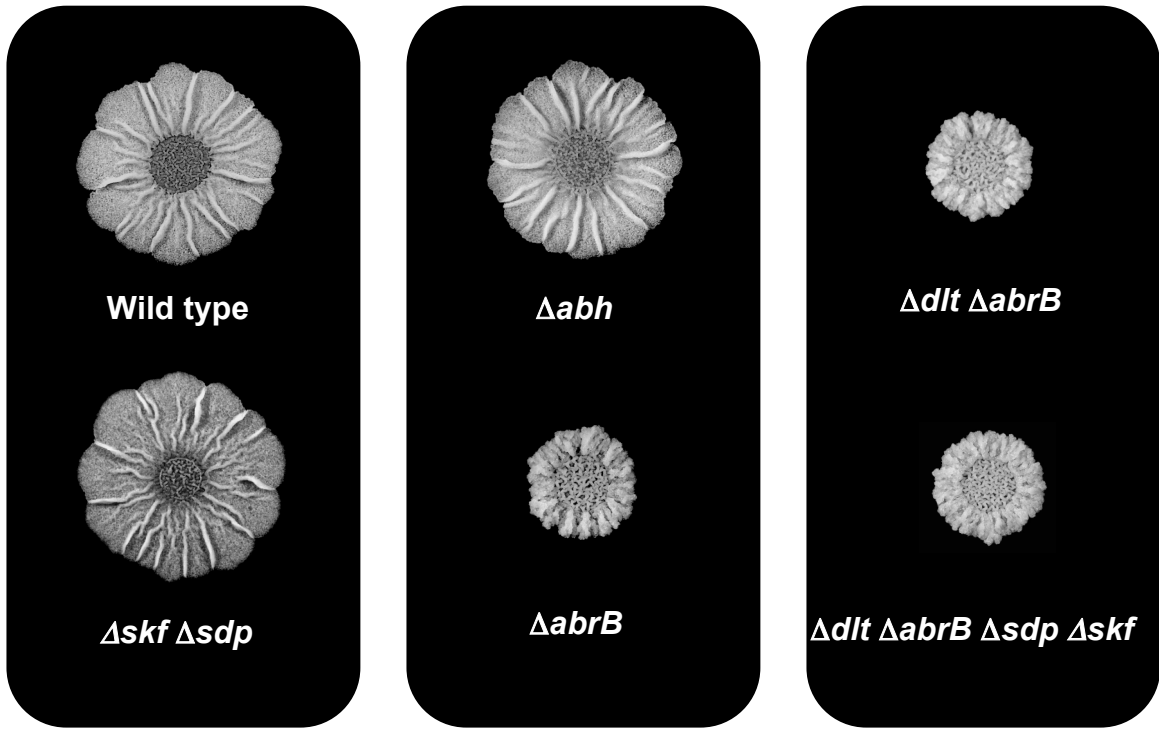

FigureS1

| Strain                                           | Genotype                                                                               | Reference                     |
|--------------------------------------------------|----------------------------------------------------------------------------------------|-------------------------------|
| <b>NCIB3610 Wild type. Undomesticated strain</b> |                                                                                        |                               |
| DL001                                            | Wild type                                                                              | Branda <i>et al.</i> , 2001   |
| DL384                                            | $\Delta abh::km$                                                                       | This study                    |
| DL482                                            | $\Delta dlt::tet$                                                                      | This study                    |
| DL594                                            | $\Delta dlt::km$                                                                       | This study                    |
| DL598                                            | $\Delta skf::cm$                                                                       | This study                    |
| DL631                                            | $\Delta sdp::spc$                                                                      | This study                    |
| DL227                                            | $\Delta kinC::mIs$                                                                     | Lopez <i>et al.</i> , 2009    |
| SB572                                            | $\Delta eps::tet \Delta tasA::km$                                                      | This study                    |
| DL638                                            | $\Delta kinC::mIs, \Delta dlt::tet, \Delta abh::km$                                    | This study                    |
| DL498                                            | $\Delta srfAA::mIs, \Delta dlt::tet, \Delta abh::km$                                   | This study                    |
| DL484                                            | $\Delta dlt::tet, \Delta abh::km$                                                      | This study                    |
| DL631                                            | $\Delta skf::cm, \Delta sdp::spc$                                                      | This study                    |
| DL633                                            | $\Delta dlt::tet, \Delta abh::km, \Delta skf::cm, \Delta sdp::spc$                     | This study                    |
| CA018                                            | $amyE::P_{yqxM}yfp$                                                                    | Vlamakis <i>et al.</i> , 2008 |
| DL821                                            | $lacA::P_{yqxM}yfp$                                                                    | This study                    |
| DL823                                            | $lacA::P_{yqxM}cfp$                                                                    | This study                    |
| DL881                                            | $amyE::P_{skf}yfp$                                                                     | This study                    |
| DL875                                            | $amyE::P_{skf}yfp, lacA::P_{yqxM}cfp$                                                  | This study                    |
| DL215                                            | $\Delta kinC::mIs, amyE::P_{yqxM}cfp$                                                  | Lopez <i>et al.</i> , 2009    |
| DL1116                                           | $\Delta kinC::mIs, amyE::P_{skf}yfp$                                                   | This study                    |
| DL645                                            | $amyE::P_{skf}lacZ$                                                                    | This study                    |
| DL647                                            | $amyE::P_{sdp}lacZ$                                                                    | This study                    |
| DL649                                            | $\Delta abh::km, amyE::P_{skf}lacZ$                                                    | This study                    |
| DL651                                            | $\Delta abh::km, amyE::P_{sdp}lacZ$                                                    | This study                    |
| DL826                                            | $\Delta dlt::tet, \Delta abh::km, amyE::P_{yqxM}yfp$                                   | This study                    |
| DL383                                            | $\Delta abrB::tet$                                                                     | Kim <i>et al.</i> , 2003      |
| DL592                                            | $\Delta abrB::tet, \Delta dlt::km$                                                     | This study                    |
| DL606                                            | $\Delta abrB::tet, \Delta dlt::km, \Delta skf::cm, \Delta sdp::spc$                    | This study                    |
| DL1279                                           | $\Delta abrB::tet, \Delta dlt::km, \Delta skf::cm, \Delta sdp::spc, lacA::P_{yqxM}cfp$ | This study                    |

**Table S1**

| <b>Name</b> | <b>Sequence</b>                                       |
|-------------|-------------------------------------------------------|
| Abh1        | 5'-GGTGTGCAAACGACTACG-'3                              |
| Abh2        | 5'-CCTATCACCTCAAATGGTTTCGCTGCACAACACCTATTGATTTTCAT-'3 |
| Abh3        | 5'-CGAGCGCCTACGAGGAATTTGTATCGCGAAGAAATTCAAGCCGC-'3    |
| Abh4        | 5'-GTGGTCCGGCTACGTGC-'3                               |
| Abhspc2     | 5'- CGTTACGTTATTAGCGAGCCAGTCCACAACACCTATTGATTTTCAT-'3 |
| Abhspc3     | 5'- CAATAAACCCCTTGCCCTCGCTACGCGAAGAAATTCAAGCCGC-'3    |
| Dlt1        | 5'- TGACTCCAGGTATCTTTTCC-'3                           |
| Dlt2        | 5'- GAGAACAACCTGCACCATTGCAAGACTGATACGTGAGCGACTG-'3    |
| Dlt3        | 5'- GGGATCAACTTTGGGAGAGAGTTTACAATTTAACAGCAGGGAGA-'3   |
| Dlt4        | 5'- GATGAACGGACGGATGTA-'3                             |
| dltKm2      | 5'- CCTATCACCTCAAATGGTTTCGCTGCTGATACGTGAGCGACTG-'3    |
| dltKm3      | 5'- CGAGCGCCTACGAGGAATTTGTATCGACAATTTAACAGCAGGGAGA-'3 |
| Skf1        | 5'-ACCTGAACATCCGCGTAA-'3                              |
| Skf2        | 5'-CTTGATAATAAGGGTAACTATTGCCGACATAGCTCCCATGCG-'3      |
| Skf3        | 5'-GGGTAAGTAGCCTCGCCGGTCCACGCCGTCTTGTATGTGCGA-'3C     |
| Skf4        | 5'-GCCCAATACATCGCTTCA-'3                              |
| Sdp1        | 5'-GAATCGCGGAAAACATGC-'3                              |
| Sdp2        | 5'-CGTTACGTTATTAGCGAGCCAGTCGATGTAGATTACCTCCTCT-'3     |
| Sdp3        | 5'-CAATAAACCCCTTGCCCTCGCTACGGTGTCTTGCGGATTGCTC-'3     |
| Sdp4        | 5'-GGGGATAACGATTTATGAAG-'3                            |
| Pskffw      | 5'-TCAGAATTCTAAGATGTTTAAACCCTCTGG-'3                  |
| Pskfrv      | 5'-TGAGGATCCCCTCTCAATTTTTGCATAGAGT-'3                 |
| Psdpfw      | 5'-AGTCTCGAATTCGAAGAAAAAGTGAATGAGCTG-'3               |
| Psdprv      | 5'- AAAAGGATCCTAAGCTAATATAATCATTTCAA-'3               |

**Table S2**
